# Supplementary material
Source: PubMed Central journal article supplement (PMC4498485)
Supplement: NIHMS474998-supplement-Table_S1.pdf [file NIHMS474998-supplement-Table_S1.pdf]

| Gene         | Name                                            | Primer Sequence          |         | Fold expression normalized to NL |
|--------------|-------------------------------------------------|--------------------------|---------|----------------------------------|
| <i>Runx2</i> | runt related transcription factor 2             | CCAACCCACGAATGCACTATC    | Forward | 0.68 $\pm$ 0.1                   |
|              |                                                 | TAGTGAGTGGTGGCGGACATA    | Reverse |                                  |
| <i>RANK</i>  | Receptor Activator of Nuclear Factor $\kappa$ B | CACCAAATGAACCCCATGTTTAC  | Forward | 0.87 $\pm$ 0.1                   |
|              |                                                 | GGACTCCTTATCTCCACTTAGGC  | Reverse |                                  |
| <i>DKK1</i>  | dickkopf 1 homolog                              | ATAGCACCTTGGATGGGTATTCC  | Forward | 1.15 $\pm$ 0.2                   |
|              |                                                 | CTGATGACCGGAGACAAACAG    | Reverse |                                  |
| <i>OPN</i>   | Osteopontin                                     | TGAGAGCAATGAGCATTCCGATG  | Forward | 1.20 $\pm$ 0.6                   |
|              |                                                 | CAGGGAGTTTCCATGAAGCCAC   | Reverse |                                  |
| <i>IL-8</i>  | interleukin 8                                   | AGGTGCAGTTTTGCCAAGGA     | Forward | 1.06 $\pm$ 1.0                   |
|              |                                                 | TTTCTGTGTTGGCGCAGTGT     | Reverse |                                  |
| <i>MMP1</i>  | matrix metalloproteinase 1                      | AAATGCAGGAATTCTTTGGG     | Forward | 0.85 $\pm$ 0.1                   |
|              |                                                 | ATGGTCCACATCTGCTCTTG     | Reverse |                                  |
| <i>CXCR4</i> | chemokine (C-X-C motif) receptor 4              | GCCTTATCCTGCCTGGTATTGTC  | Forward | 1.32 $\pm$ 0.6                   |
|              |                                                 | GCGAAGAAAGCCAGGATGAGGAT  | Reverse |                                  |
| <i>Actb</i>  | beta-actin                                      | AATGTGGCCGAGGACTTTGATTGC | Forward | reference gene                   |
|              |                                                 | AGGATGGCAAGGGACTTCCTGTAA | Reverse |                                  |
